# Supplementary material for: Identification of novel compounds, oleanane- and ursane-type triterpene glycosides, from Trevesia palmata: their biocontrol activity against phytopathogenic fungi
Source: PubMed Central journal article supplement (PMC6162204; doi:10.1038/s41598-018-32956-4), 2018-09-28
Supplement: 41598_2018_32956_MOESM1_ESM.pdf [file 41598_2018_32956_MOESM1_ESM.pdf]

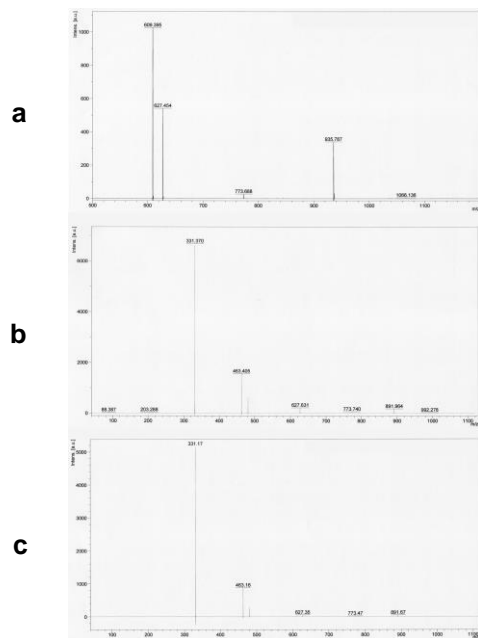

**Supplementary Fig. S1.** . MALDI-MS/MS fragmentation of m/z 1081, 935, and 773  $[M + Na]^+$  for compounds TPG1 (a), TPG2 (b), and TPG3 (c) isolated from *Trevesia palmata*.

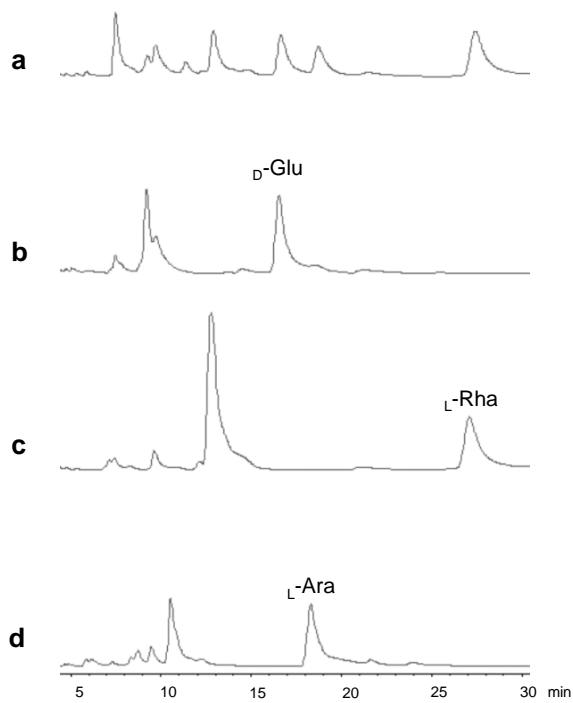

**Supplementary Fig. S2.** HPLC chromatograms for the derivatives of compound TPG1 hydolysate (a) and standard sugars (b–d).

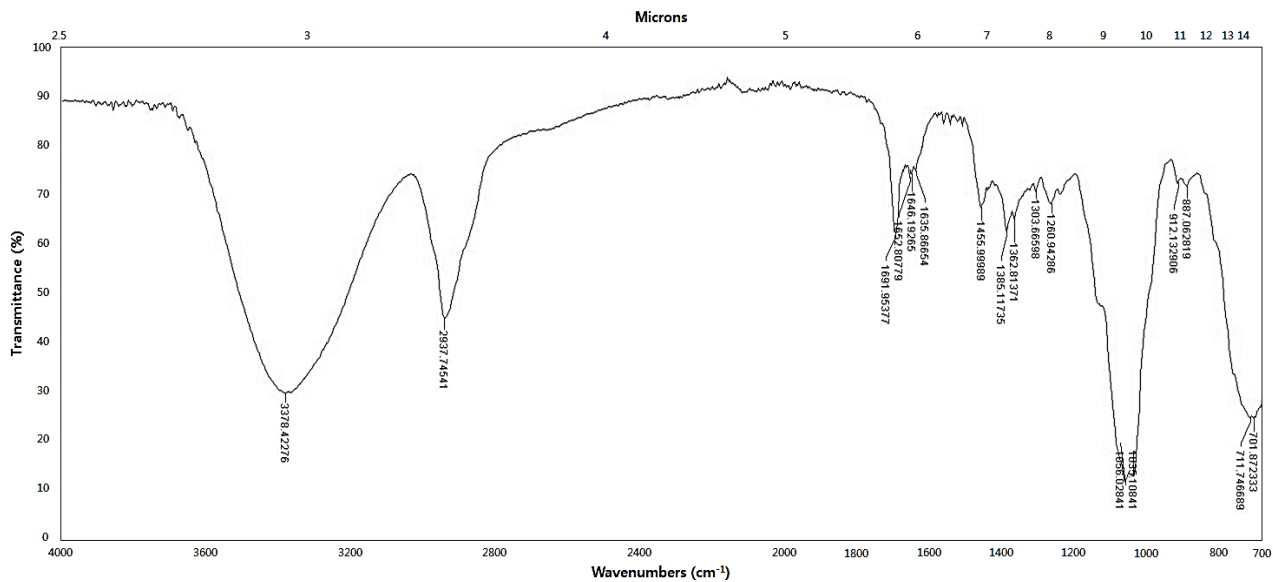

**Supplementary Fig. S3.** IR spectrum of compound TPG1 isolated from *Trevesia palmata*.

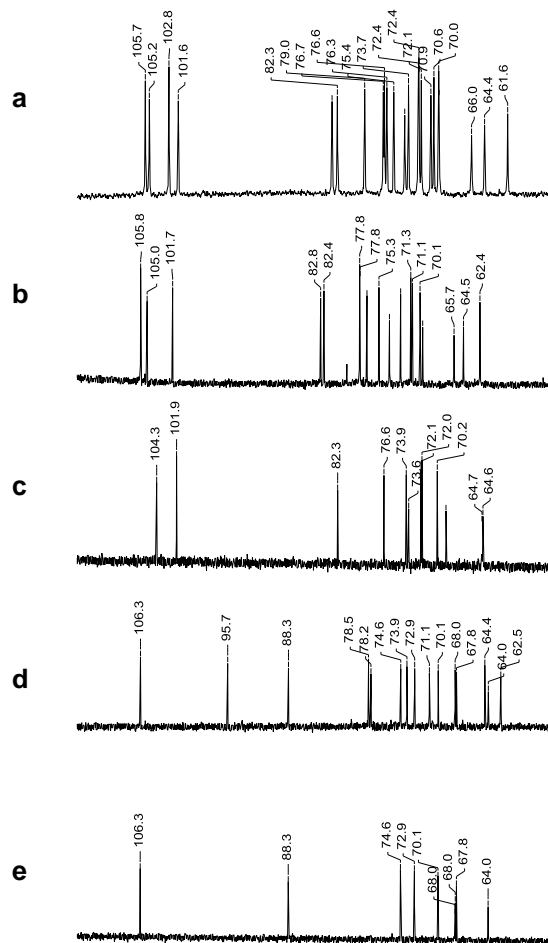

**Supplementary Fig. S4.** Comparison of  $^{13}\text{C}$ -NMR spectra of oligosaccharide moiety of triterpene glycosides TPG1 (a), TPG2 (b), TPG3 (c), TPG4 (d), and TPG5 (e).

| Pathogen                                                     | IC <sub>50</sub> (µg/ml) |       |       |       |      |
|--------------------------------------------------------------|--------------------------|-------|-------|-------|------|
|                                                              | TPG1                     | TPG2  | TPG3  | TPG4  | TPG5 |
| <i>Agrobacterium tumefaciens</i>                             | > 256                    | > 256 | > 256 | > 256 | >256 |
| <i>Burkholderia glumae</i>                                   | > 256                    | > 256 | > 256 | > 256 | >256 |
| <i>Clavibacter michiganensis</i> subsp. <i>michiganensis</i> | 158                      | 195   | 78    | > 256 | 112  |
| <i>Pectobacterium carotovorum</i> subsp. <i>carotovorum</i>  | > 256                    | > 256 | > 256 | > 256 | >256 |
| <i>Pseudomonas syringae</i> pv. <i>actinidiae</i>            | > 256                    | > 256 | > 256 | > 256 | >256 |
| <i>Xantomonas arboricola</i> pv. <i>pruni</i>                | > 256                    | > 256 | > 256 | > 256 | >256 |
| <i>Ralstonia solanacearum</i>                                | > 256                    | > 256 | > 256 | > 256 | >256 |

**Supplementary Table S1.** IC<sub>50</sub> values of TPGs against phytopathogenic bacteria. Half maximal inhibitory concentration (IC<sub>50</sub>) values of TPGs against plant pathogenic bacteria were determined by broth microdilution assay using two-fold serial dilutions starting with 256 µg/ml as described by the modified CLSI M38-A method. Bacterial suspensions (1 × 10<sup>4</sup> cells/ml) grown in tryptic soy broth (BD Biosciences) was used as inocula. Aqueous 5% methanol solution without the chemical were also used as a control. The inhibitory effects on the growth of microbes were determined after incubation for 1–3 days. The optical density at 600 nm (OD<sub>600</sub>) of each well was recorded using a microplate reader. Growth inhibition (%) was calculated as [1 - (OD<sub>600</sub> of treatment / OD<sub>600</sub> of control)] × 100. IC<sub>50</sub> values were calculated from the concentration–response curves.
